# Supplementary material for: An Energy-Efficient Flexible Multi-Modal Wireless Sweat Sensing System Based on Laser Induced Graphene
Source: MDPI journal article supplement (doi:10.3390/s23104818), 2023-05-17
Supplement: s1 [file s1]

# **An Energy-efficient Flexible Multi-modal Wireless Sweat Sensing System Based on Laser Induced Graphene**

## **Supplementary Materials**

Jiuqing Feng<sup>1</sup>, Yizhou Jiang<sup>1</sup>, Kai Wang<sup>1</sup>, Jianzheng Li<sup>1</sup>, Jialong Zhang<sup>1</sup>, Mi Tian<sup>2</sup>, Guoping Chen<sup>1,\*</sup>,  
Laigui Hu<sup>1</sup>, Yiqiang Zhan<sup>1</sup> and Yajie Qin<sup>1,\*</sup>

<sup>1</sup> School of Information Science and Technology, Fudan University, Shanghai, 200433, China

<sup>2</sup> Huashan Hospital, Shanghai 200040, China

\*Corresponding author. Email: yajieqin@fudan.edu.cn (Y.Q.); gpchenapple@fudan.edu.cn (G.C.)

(a) Voltage Channel

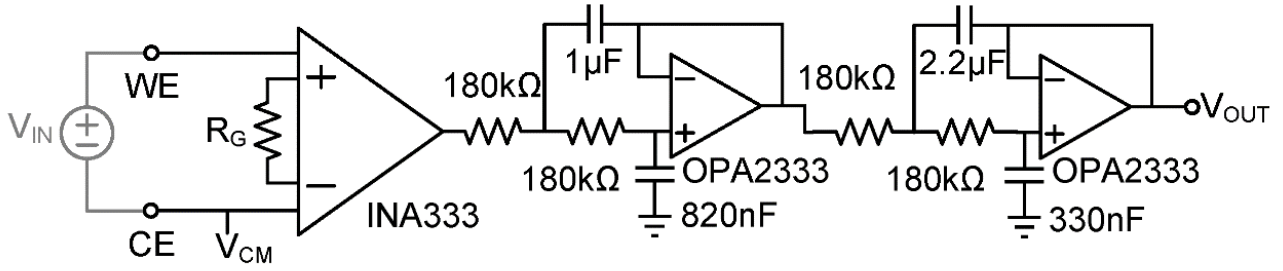

(b) Current Channel

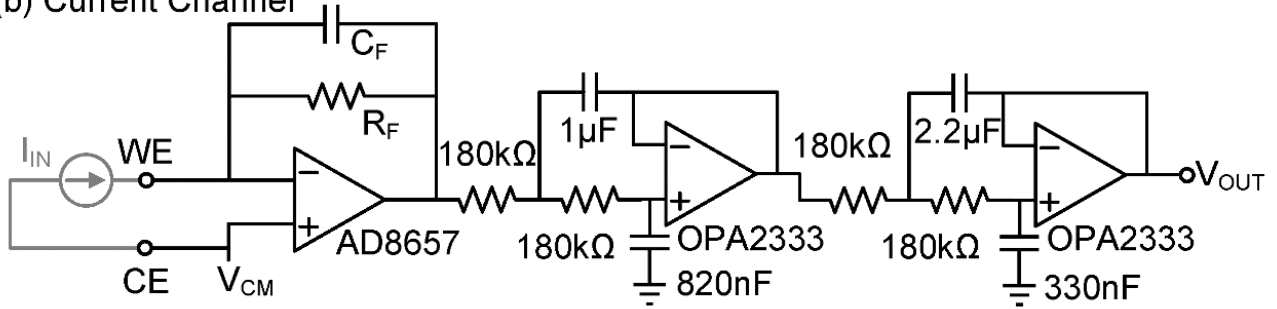

Figure S1: Schematic of the (a) voltage and (b) current sensing channels in the wireless sensor patch.

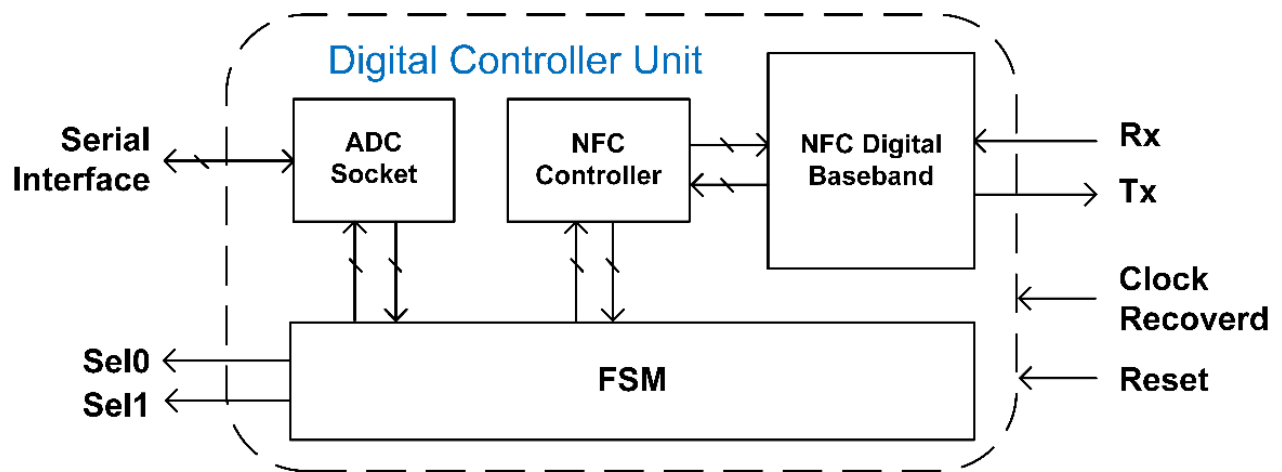

Figure S2: Block diagram of the DCU.

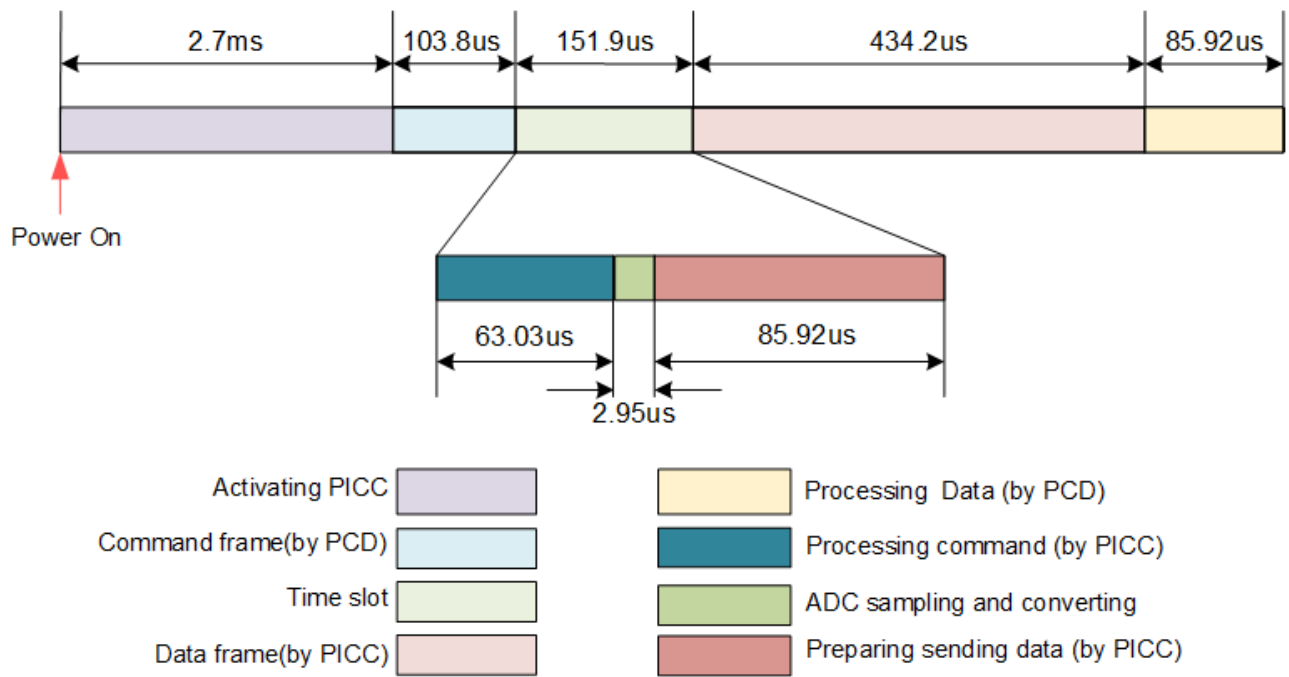

**Figure S3: Timing diagram of the working process.**

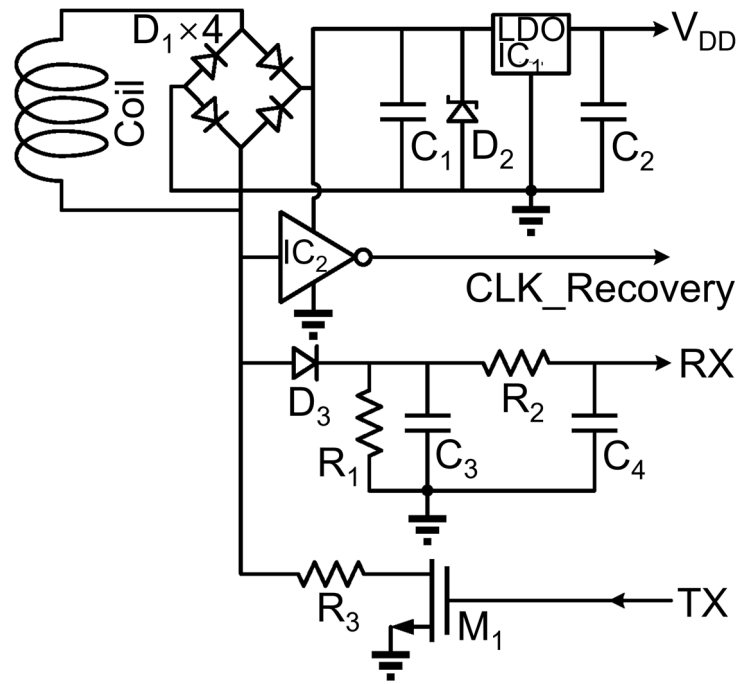

**Figure S4: Schematic of the NFC AFE.**

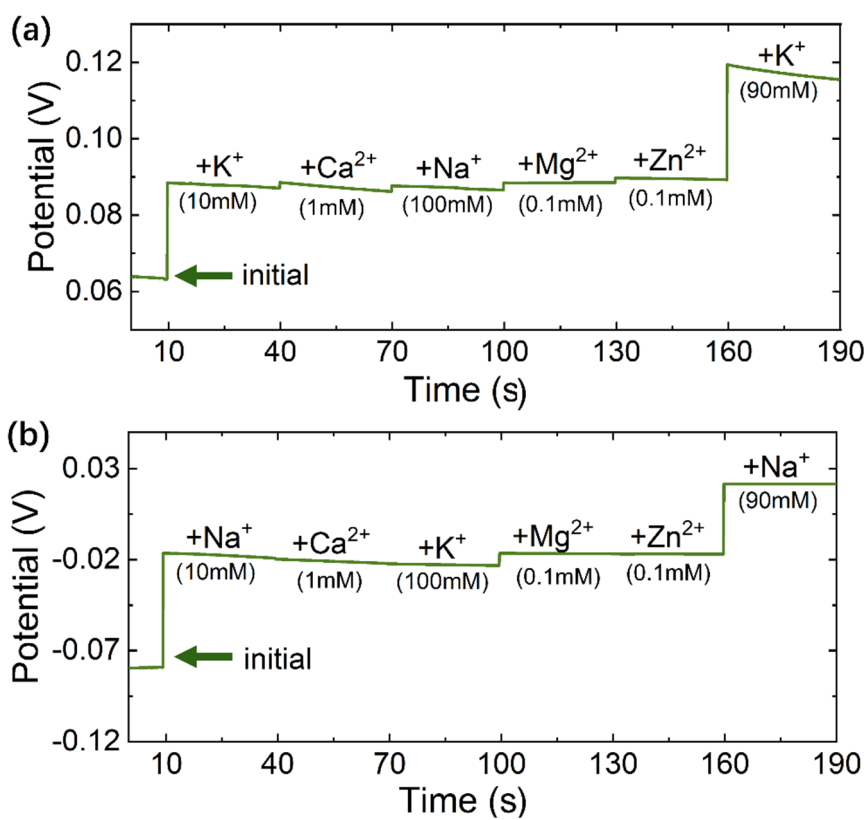

Figure S5: CP curve of ISEs electrode selectivity test results. (a) K<sup>+</sup> and (b) Na<sup>+</sup>.

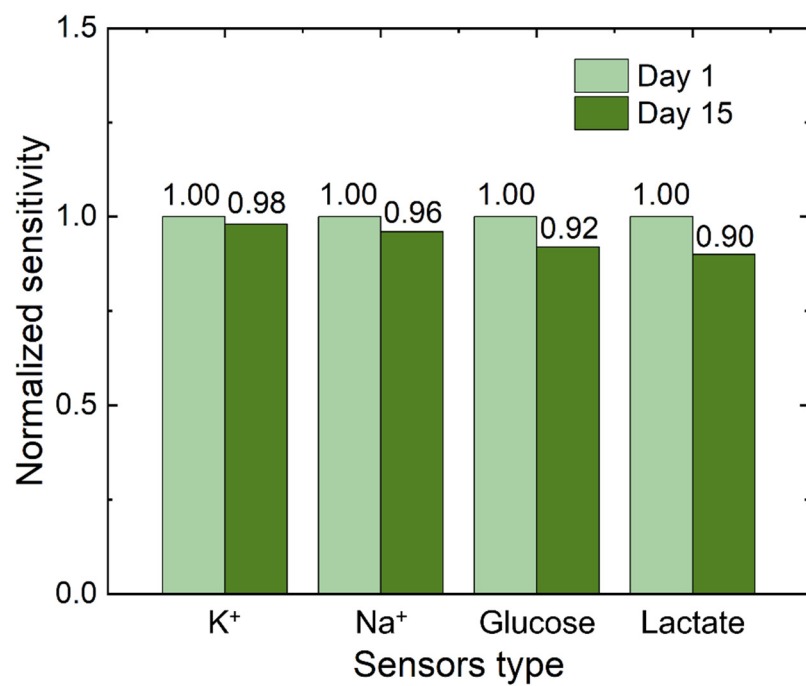

**Figure S6: Long-term stability of the sensors.**

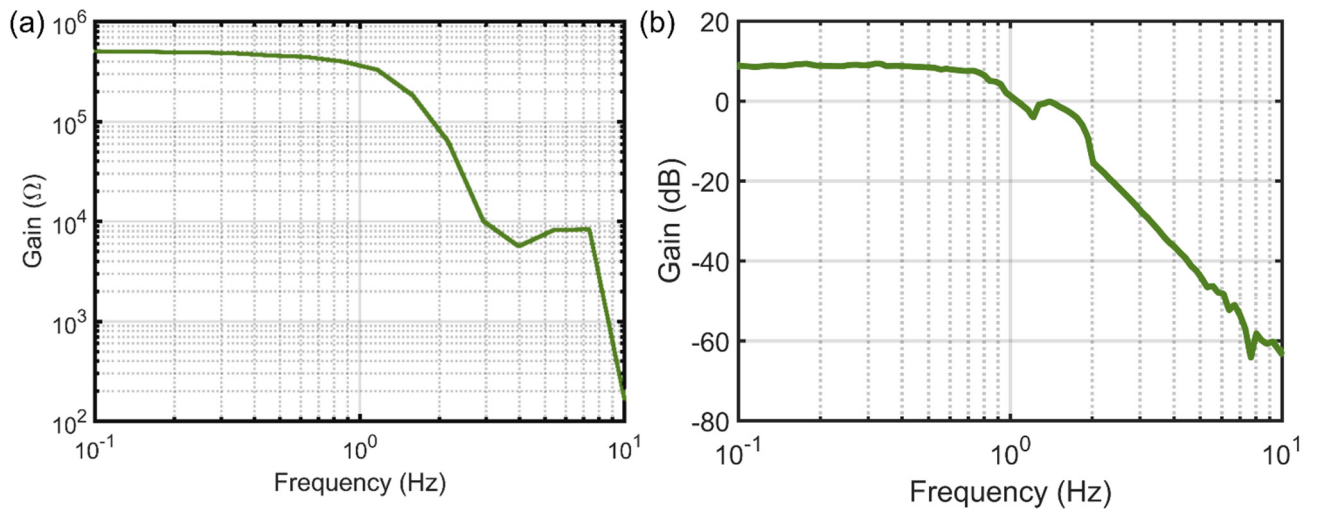

**Figure S7: Measured gain-frequency response of the (a) I-mode channel (Transimpedance = 510 k $\Omega$ ) and (b)**

**V-mode sensing channel (Gain = 3 V/V).**



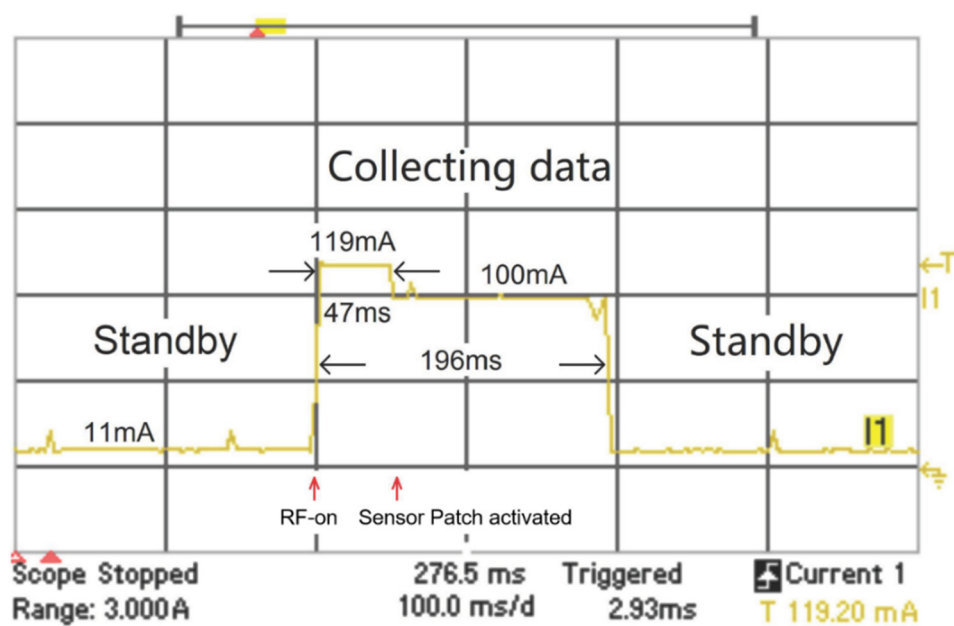

Figure S8: The current waveform of a typical sweat sensing task.

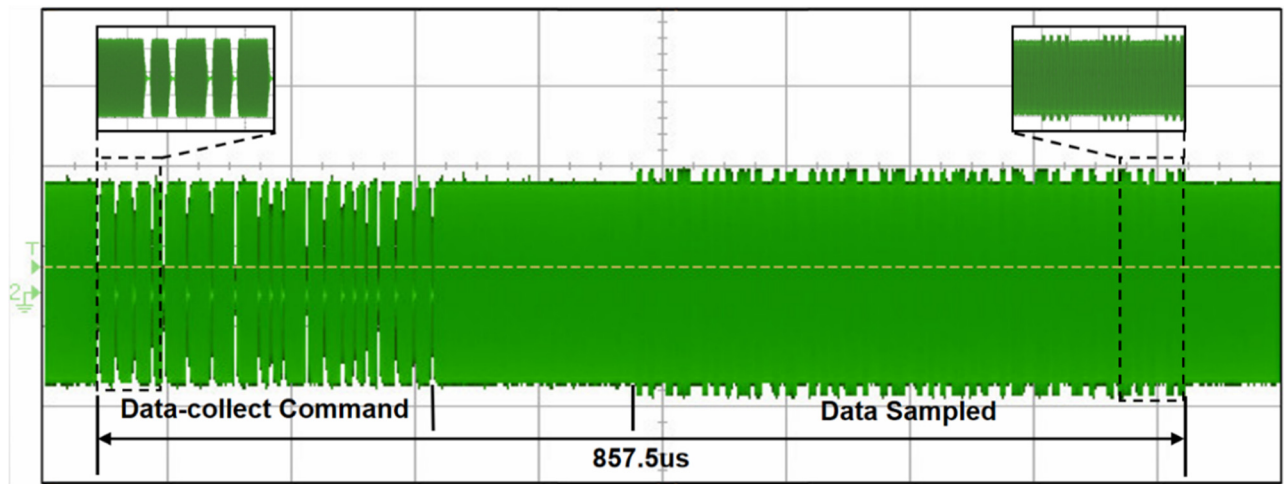

Figure S9: The RF waveform of a typical data collection and transmission task.

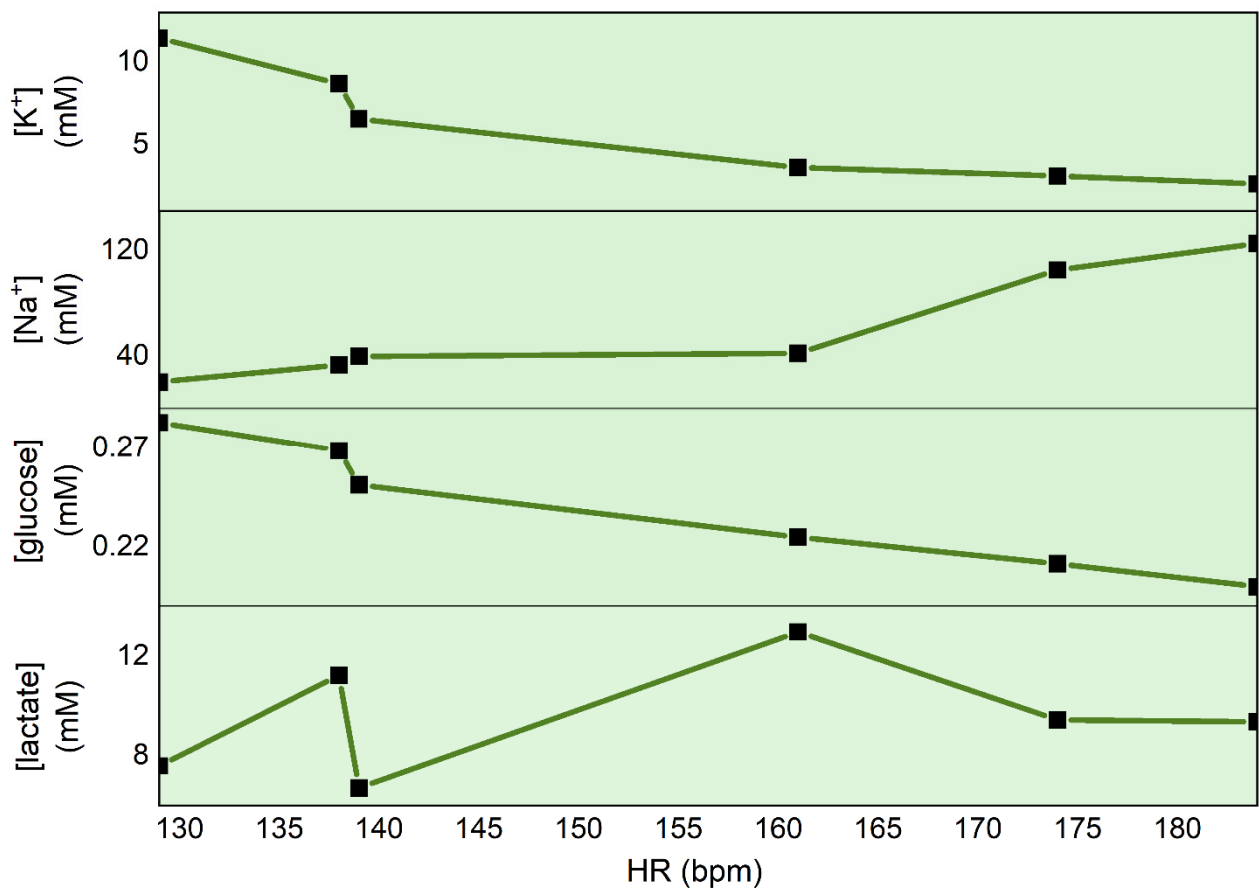

Figure S10: Biosensor responses as a function of HR *ex-vivo* sweat analysis.

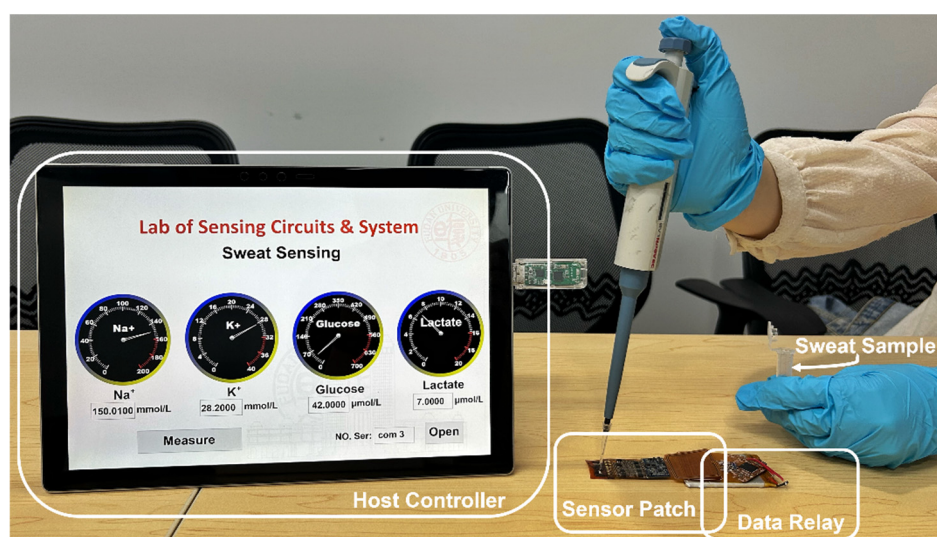

**Figure S11: The placement and attachment of the components for the complete system.**

**Table S1: Key components of the NFC AFE.**

| Component       | Function             | Device/Value         |
|-----------------|----------------------|----------------------|
| D <sub>1</sub>  | Rectifier            | CUS08F30             |
| C <sub>1</sub>  | Decoupling Capacitor | 1 $\mu$ F, 0402      |
| D <sub>2</sub>  | Zener Diode          | MMSZ4686             |
| IC <sub>1</sub> | LDO                  | LP5907-3.3           |
| C <sub>2</sub>  | Decoupling Capacitor | 1 $\mu$ F, 0402      |
| IC <sub>2</sub> | Clock Recovery       | SN74LVC1G04DRLR      |
| D <sub>3</sub>  | Demodulator          | CUS08F30             |
| R <sub>1</sub>  | Demodulator          | 3.6k $\Omega$ , 0402 |
| C <sub>3</sub>  | Demodulator          | 43pF, 0402           |
| R <sub>2</sub>  | LPF                  | 7.5k $\Omega$ , 0402 |
| C <sub>4</sub>  | LPF                  | 12pF, 0402           |
| R <sub>3</sub>  | Modulator            | 100 $\Omega$ , 0402  |
| M <sub>1</sub>  | Modulator            | BSS123               |
